# Supplementary material
Source: PubMed Central journal article supplement (PMC9263323)
Supplement: mmc1.pdf [file mmc1.pdf]

## **Supplemental Information**

### **Locally secreted BiTEs complement**

### **CAR T cells by enhancing killing of antigen**

### **heterogeneous solid tumors**

**Yibo Yin, Jesse L. Rodriguez, Nannan Li, Radhika Thokala, MacLean P. Nasrallah, Li Hu, Logan Zhang, Jiasi Vicky Zhang, Meghan T. Logun, Devneet Kainth, Leila Haddad, Yang Zhao, Tong Wu, Emily X. Johns, Yu Long, Hongsheng Liang, Jiping Qi, Xiangtong Zhang, Zev A. Binder, Zhiguo Lin, and Donald M. O'Rourke**

1 **Materials and methods:**

2 **Enzyme-linked immunosorbent assay (ELISA)**

3 A standard direct ELISA was performed with DuoSet Ancillary Reagent Kit 2 (R&D  
4 systems, Minneapolis, MN). After coating wells with recombinant human EGFR (1µg/mL),  
5 EGFRvIII (1µg/mL) and IL13Rα2 (4µg/mL) protein (Sino Biological, Wayne, PA), a 96-well plate  
6 was loaded with supernatants which were collected as described above, followed by biotin  
7 conjugated goat anti-mouse IgG (Jackson ImmunoResearch, West Grove, PA) detection  
8 antibody and horseradish peroxidase conjugated streptavidin. For detecting IFNγ, IL2 and TNFα  
9 by ELISA, supernatant was collected from T cells and target cells after 16hrs co-culture at a 1:1  
10 ratio. The detection was performed with DuoSet ELISA kits (R&D Systems, Minneapolis, MN) as  
11 the introduction indicated.

12

13 **Impedance Cytotoxicity Assays**

14  $5 \times 10^4$  target tumor cells or  $3 \times 10^4$  target human astrocyte cells were seeded into Axion  
15 Biosystems microelectrode-containing 96-well plates (Axion Biosystems, Atlanta, GA). Each  
16 impedance plate was prepared prior to experimentation by coating with 0.05% poly-D-lysine  
17 hydrobromide (Sigma Aldrich, St. Louis, MO), followed by 20 µg/mL laminin overnight at 37 °C.  
18 After coating was complete, wells were rinsed thrice with diH<sub>2</sub>O and then overlaid with 100 µL  
19 of cell culture media. The plate was placed into the Axion Biosystems ZHT analyzer (Axion  
20 Biosystems, Atlanta, GA) to record baseline readings of the background impedance without  
21 cells present. After baseline was established, the plate was removed from the analyzer and was  
22 seeded with 50k target cells in a volume of 200 µL/well. After cell plating, the plate was left in

1 the cell culture hood for 1h at room temperature to ensure settling and attachment of the cells  
2 down to the microelectrodes on the bottom surface. The plate was then returned to the  
3 analyzer and data collection began. Data were collected every 1 min for 24 h for cell monolayer  
4 growth measurement. For cytotoxicity assessment, the instrument was paused at 24h, and  
5 media was exchanged for media containing 1:1 dosages of effector cells or UTD control T cells,  
6 or media alone. Changes in impedance are reported as the resistive component of the complex  
7 impedance, as described previously. Using AxIS Z software (Axion Biosystems, Atlanta, GA), all  
8 data are corrected for “media alone” to remove small changes in media only impedance over  
9 time and then normalized to the impedance at the time of addition of effector cells. The %  
10 cytotoxicity calculations utilize the no treatment control and full lysis controls to determine % of  
11 target cell cytotoxicity as follows:

$$\%Cytotoxicity_{sample}(t) = \left[ \frac{Z_{sample}(t) - \overline{Z_{FullLysis}(t)}}{\overline{Z_{TargetOnly}(t)} - \overline{Z_{FullLysis}(t)}} \right] \times 100\%$$

## 12 Immunohistochemistry

13 Formalin-fixed paraffin-embedded tissue sections, 5µm thick, were stained using  
14 antibody against IL13Rα2 (clone E7U7B, Cell Signaling 85677, dilution 1:100, Danvers, MA) and  
15 EGFRVIII (clone D6T2Q, Cell Signaling 64952S, dilution 1:100, Danvers, MA), or isotype control  
16 (Leica Biosystem PA077, Buffalo Grove, IL). The double staining was done sequentially on a  
17 Leica Bond-III™ instrument using the Bond Polymer Refine DAB Detection System (Leica  
18 Microsystems DS9800, Buffalo Grove, IL) and Refine Red Detection System (Leica Microsystems  
19 DS9390, Buffalo Grove, IL). Heat-induced epitope retrieval was done in ER2 solution (Leica Bio

1 systems AR9640) for 20 minutes. The entire experiment was done at room temperature. Slides  
2 were washed three times between each step with bond wash buffer or water.

3

4 **FIGURE AND FIGURE**

5 **LEGENDS:**

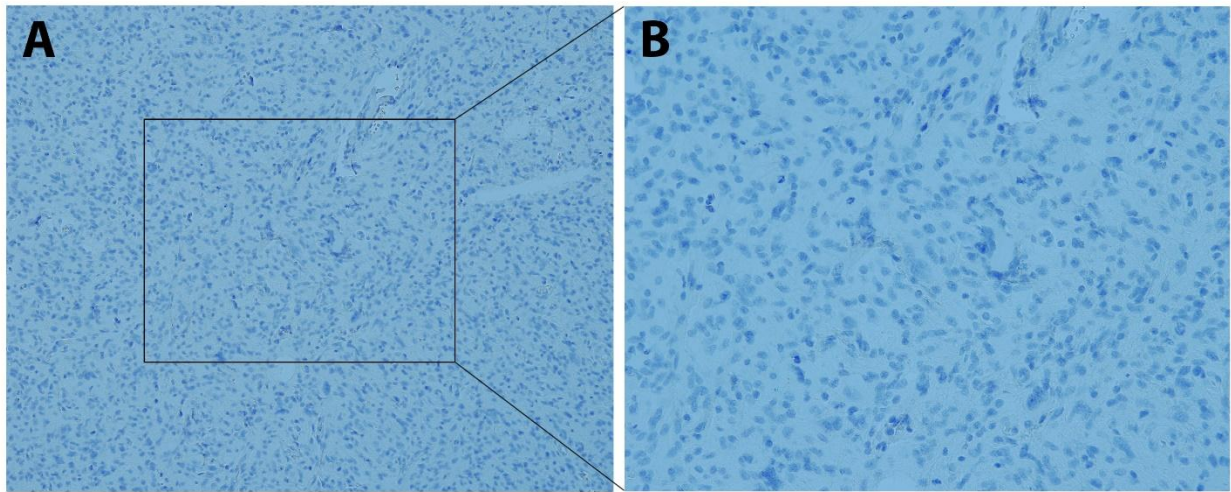

6

7 **Figure S1. Immunohistochemical stains of IL13R $\alpha$ 2 and EGFRvIII isotype control in resected glioma**  
8 **tissues.**

9 (A)  $\times 100$  original magnification. (B)  $\times 200$  original magnification.

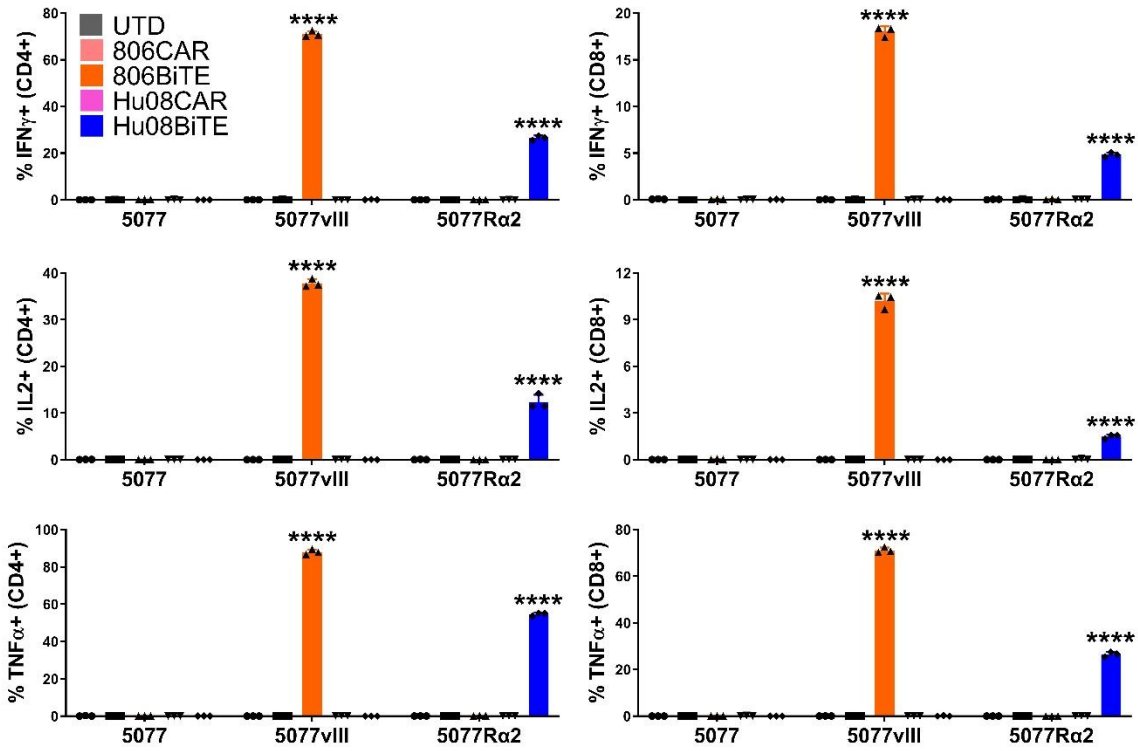

1

2 **Figure S2. BiTEs significantly responding to target positive glioma cells**

3 Flow based intracellular cytokine (IFN $\gamma$ , IL2 and TNF $\alpha$ ) staining of UTD T cells (UTD) co-cultured  
 4 with target cells in conditioned media of CAR/BiTE T cells. CD4+ (left) and CD8+ (right)  
 5 subgroups of T cells were distinguished by human CD8 staining. Statistically significant  
 6 differences were calculated by one-way ANOVA with post hoc Tukey test. \*\*\*\*p<0.0001. Data  
 7 are presented as means  $\pm$  SD.

8

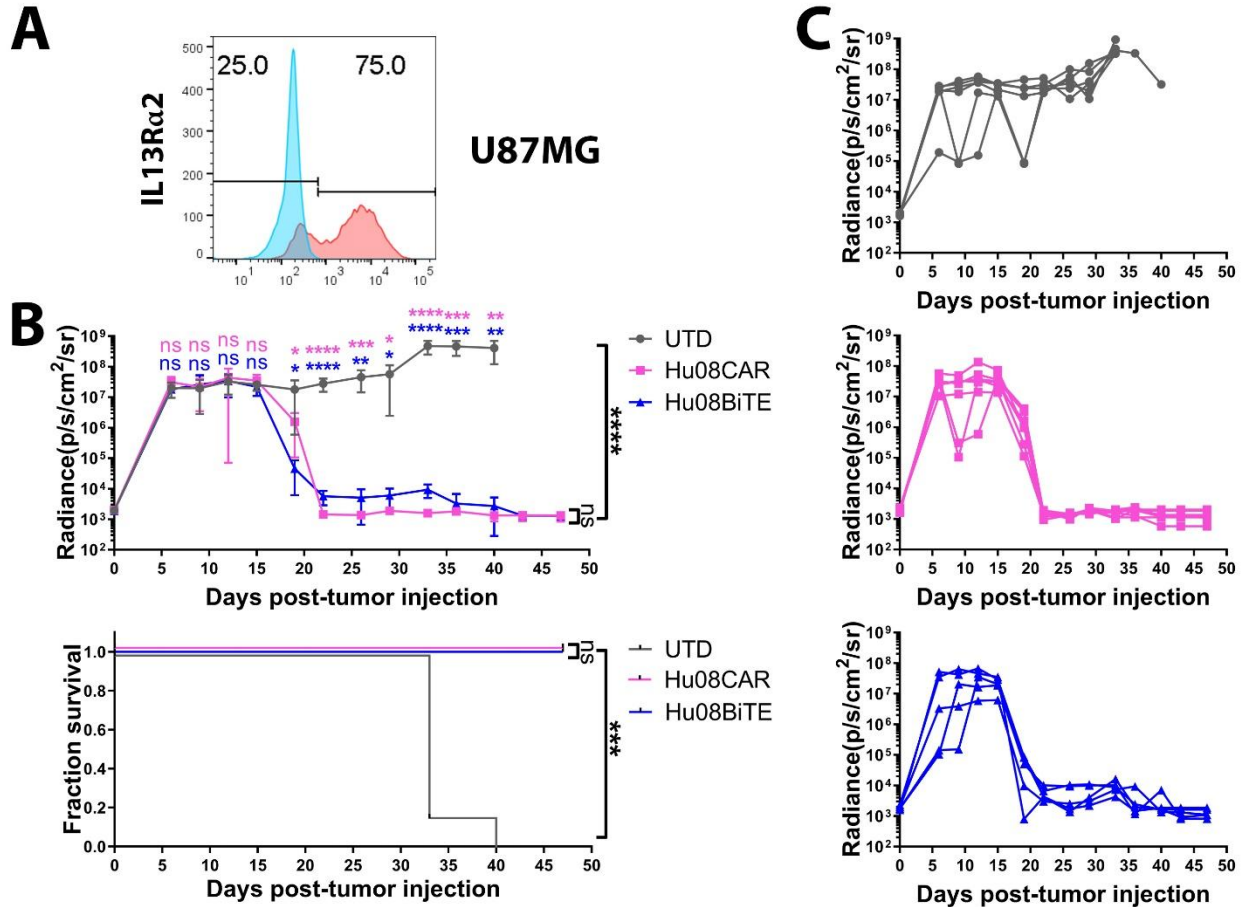

1  
 2 **Figure S3. Hu08BiTE T cells significantly inhibited tumor growth in a U87MG orthotopically**  
 3 **implanted glioma mouse model.**

4 (A) Flow profile showing the expression of IL13Rα2 (Red) in U87MG cells, with staining control  
 5 (blue). (B) 800,000 Hu08CAR/BiTE transduced T cells or the same number of un-transduced T  
 6 cells were given by i.v. infusion in NSG mice orthotopically implanted with the U87MG tumor, 8  
 7 days after tumor injection. Bioluminescence imaging were repeated every 3-4 days to evaluate  
 8 the tumor growth. Endpoint was predefined by the mouse hunch, inability to ambulate as  
 9 predetermined IACUC approved morbidity endpoint. Statistically significant differences were  
 10 calculated by one-way ANOVA with post hoc Tukey test. In bioluminescence imaging, the  
 11 differences were labelled in each time point between experimental groups with un-transduced

1 T cells infusion group. Linear regression was used to test for significant differences between the  
2 experimental groups. Survival based on time to endpoint was plotted using a Kaplan-Meier  
3 curve (Prism software). Statistically significant differences were determined using log-rank test.  
4 ns, not significant; \* $p < 0.05$ , \*\* $p < 0.01$ , \*\*\* $p < 0.001$ , \*\*\*\* $p < 0.0001$ . Data are presented as  
5 means  $\pm$  SD.

6

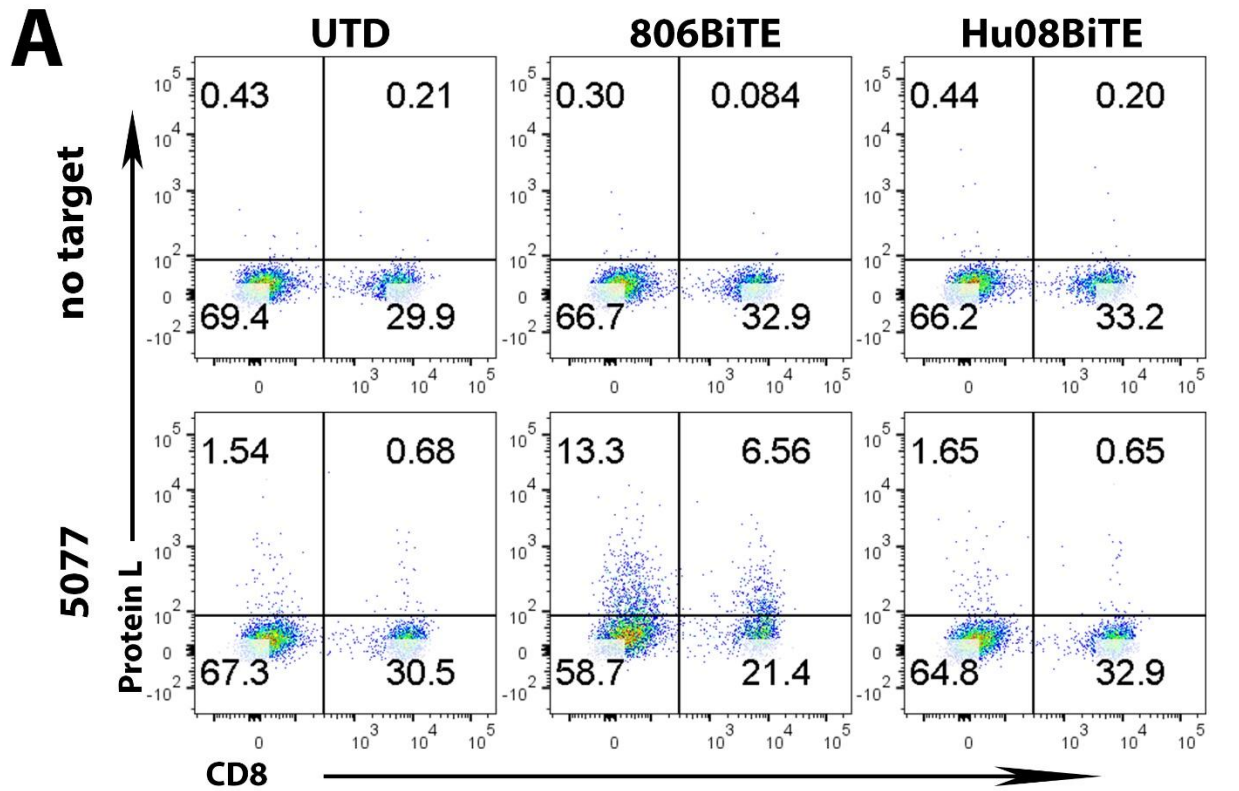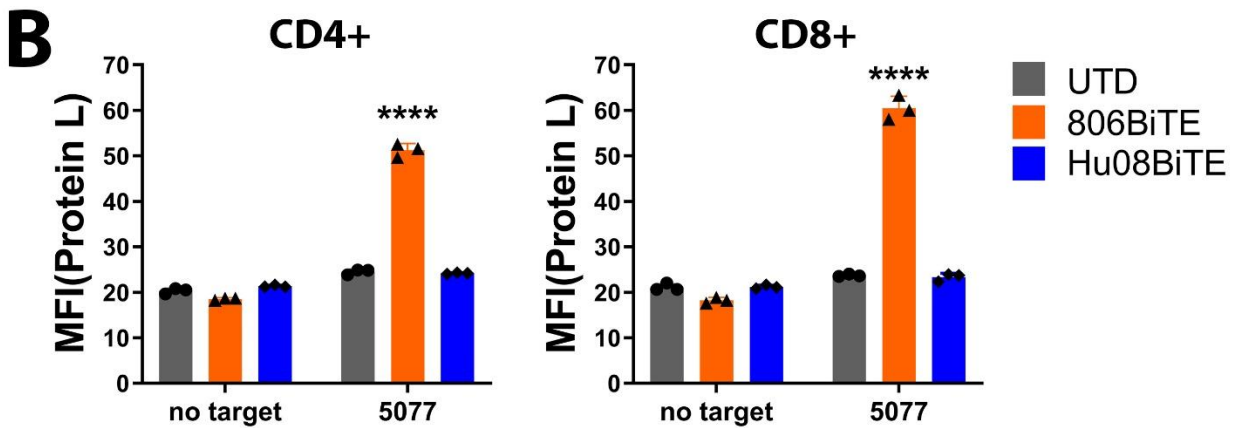

1  
 2 **Figure S4. Protein L detected 806BiTE binding on 806BiTE secreting T cells when co-cultured**  
 3 **with 5077 cells.**  
 4 BiTE binding on T cells was detected by biotinylated protein L with secondary streptavidin  
 5 coupled FITC after 16hrs co-culture. (A) Flow based results of representative samples. CD8 was  
 6 stained to distinguish the CD4-positive and CD8-positive subgroups of T cells along the x axis. (B)



- 1 The median fluorescence intensity (MFI) was quantified on CD4 and CD8 positive T cells.
- 2 Statistically significant differences were calculated by one-way Analysis of Variance (ANOVA)
- 3 with post hoc Tukey test. \*\*\*\*p<0.0001. Data are presented as means  $\pm$  SD.

**A****Astrocyte Impedance**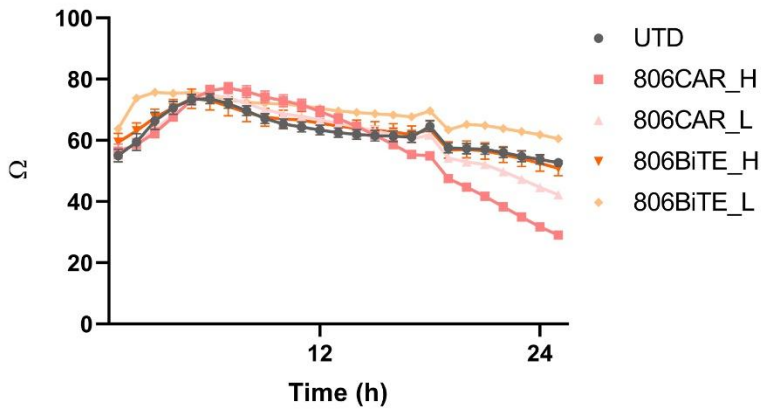**Astrocyte Cytolysis**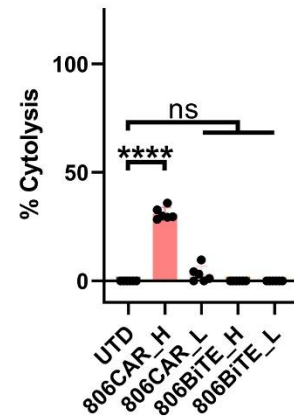**B****5077 Impedance**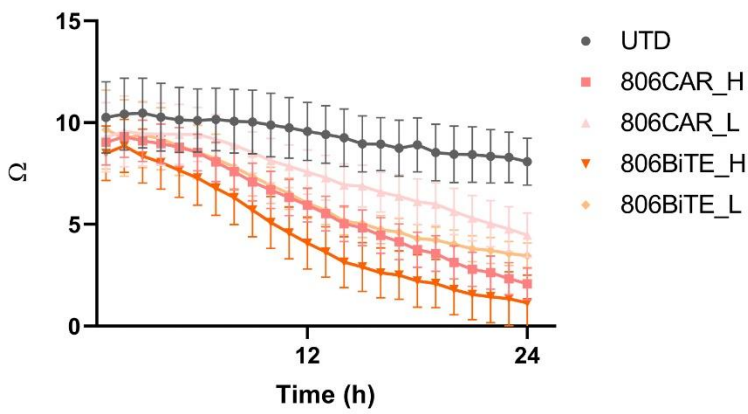**5077 Cytolysis**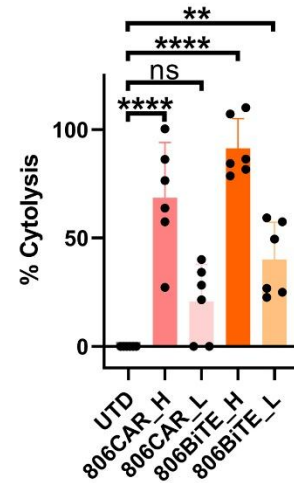**C****5077vIII Impedance**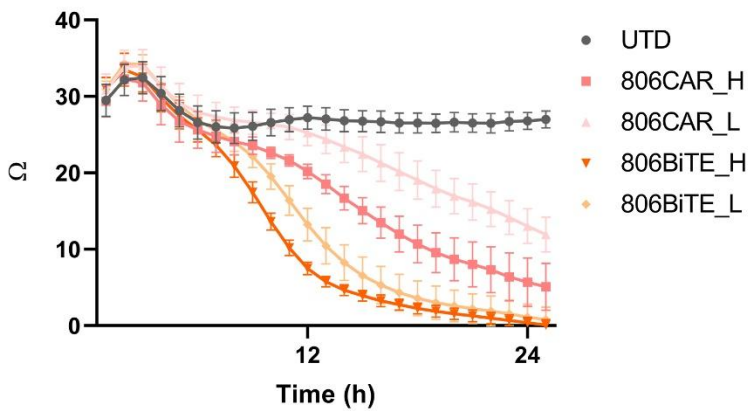**5077vIII Cytolysis**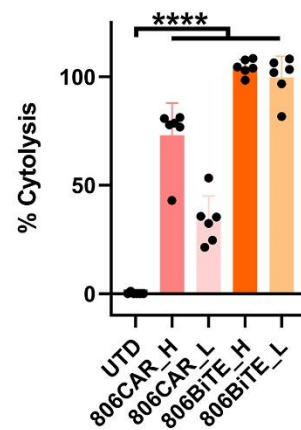

1 **Figure S5. 806BiTE T cells minimally responded to physically expressed EGFR on astrocytes**  
2 **and superior responded to EGFR and EGFRvIII expressed on 5077 glioma stem cells in**  
3 **impedance cytotoxicity assays.**

4 CAR/BiTE T cell cytotoxicity assays were performed using cellular impedance recording for  
5 monolayers of (A) human astrocytes, (B) 5077 tumor cells, (C) 5077vIII tumor cells over 24 h of  
6 co-culture with 1:1 UTD, 806CAR\_H, 806CAR\_L, 806BiTE\_H, or 806BiTE\_L CAR T cells.  
7 Impedance values (left) were recorded every 60 sec for 24 h. Percent cytolysis values (right) at  
8 24 h shown for all CAR/BiTE T cells compared to UTD T cell groups. N = 6 replicates per  
9 treatment. Statistically significant differences were calculated by one-way ANOVA with post hoc  
10 Tukey test. ns, not significant; \* $p < 0.05$ , \*\* $p < 0.01$ , \*\*\* $p < 0.001$ , \*\*\*\* $p < 0.0001$ . Data are  
11 presented as means  $\pm$  SD.

12

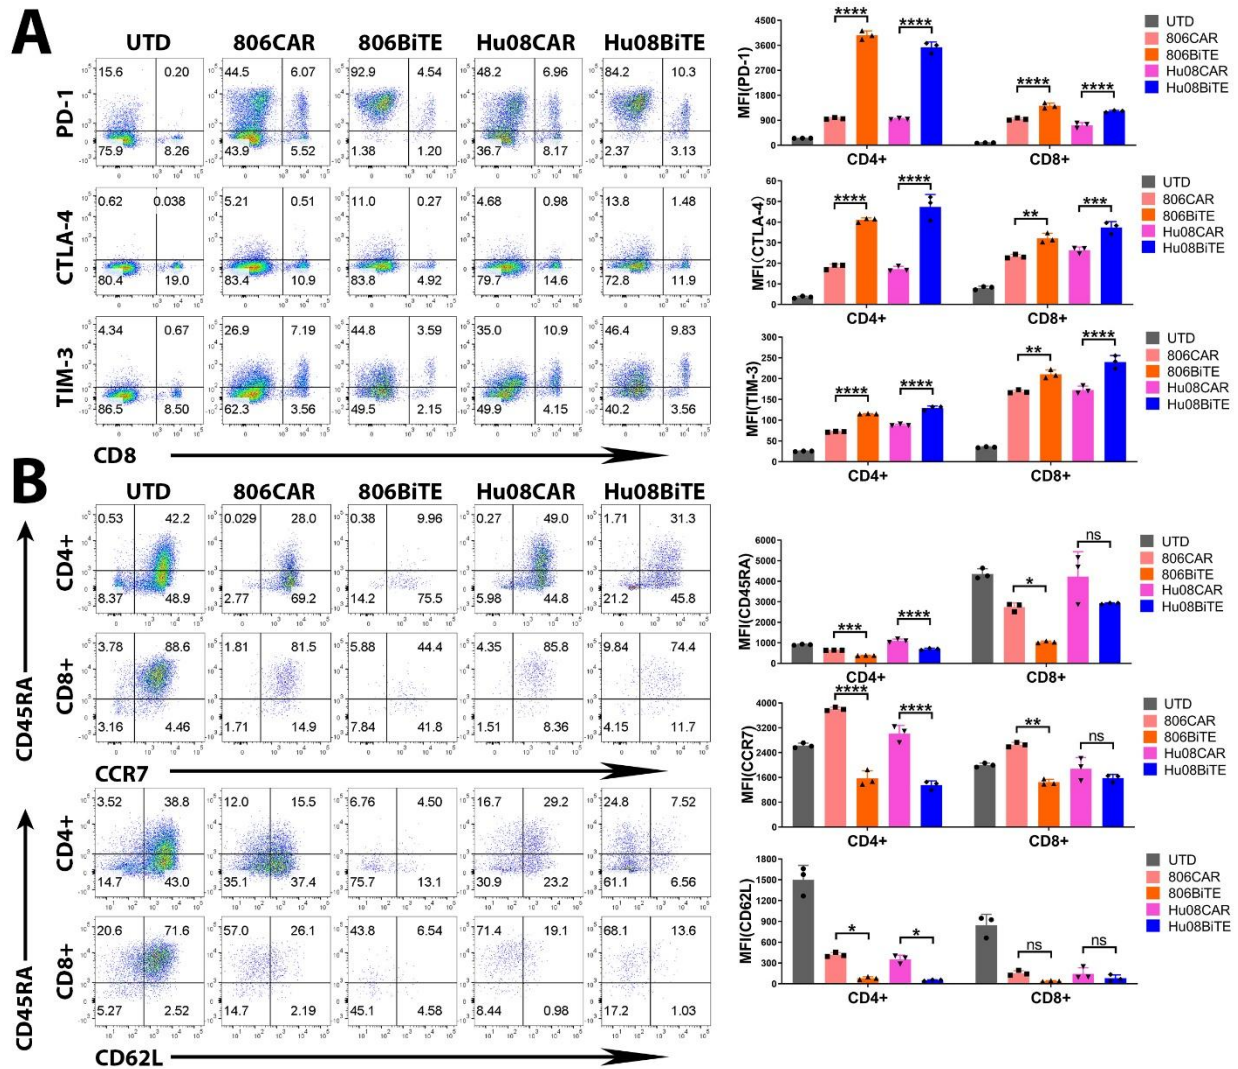

1  
2 **Figure S6. BiTEs significantly upregulated checkpoints and T cell effector subtypes after co-**  
3 **culturing with 5077<sup>EGFRVIII+</sup>, IL13R $\alpha$ 2<sup>+</sup> cells.**

4 (A) The expression of checkpoints (PD-1, CTLA-4 and TIM-3) on the T cells was determined by  
5 flow cytometry after overnight co-culturing of CAR/BiTE T cells with 5077<sup>EGFRVIII+</sup>, IL13R $\alpha$ 2<sup>+</sup> cells.  
6 Flow based results of representative samples were illustrated, CD8 was stained to distinguish  
7 the CD4-positive and CD8-positive subgroups of T cells along the x axis. The median  
8 fluorescence intensity (MFI) was quantified and compared between CAR T cells and BiTE T cells.  
9 (B) The expression of CD45RA, CCR7 and CD62L on the T cells was determined by flow

1 cytometry after 4 days co-culturing of CAR/BiTE T cells with 5077<sup>EGFR<sup>VIII+</sup>, IL13R $\alpha$ 2<sup>+</sup></sup> cells. Flow based  
2 results of representative samples were illustrated. The median fluorescence intensity (MFI) was  
3 quantified and compared between CAR T cells and BiTE T cells on CD4-positive and CD8-positive  
4 subgroups. Statistically significant differences were calculated by one-way ANOVA with post  
5 hoc Tukey test. ns, not significant; \*p<0.05, \*\*p<0.01, \*\*\*p<0.001, \*\*\*\*p<0.0001. Data are  
6 presented as means  $\pm$  SD.
